# Supplementary material
Source: Research Square preprint supplement (doi:10.21203/rs.3.rs-8829244/v1)
Supplement: Supplementary file 1 [file 553408cf0e9d0e9d5b223e3c.docx]

Supplementary Information

Table S1: Shoot and root dry weight biomass and stem diameter of *Allium porrum* inoculated with or without *R. irregularis* and supplied or not with RP in the hyphosphere compartment.

|  | |  | | Shoot biomass (g/pot) | | |  | | Root biomass (g/pot) | | |  | | Stem diameter (mm) | | |
| --- | --- | --- | --- | --- | --- | --- | --- | --- | --- | --- | --- | --- | --- | --- | --- | --- |
|  |  | | No AMF | | with AMF |  | | No AMF | | with AMF |  | | No AMF | | with AMF |
| P0 |  | | 0.81 ± 0.10 | | 1.92 ± 0.10 |  | | 0.98 ± 0.04 | | 2.00 ± 0.19 |  | | 4.41 ± 0.26 | | 6.11 ± 0.27 |
| P1 |  | | 1.00 ± 0.12 | | 1.97 ± 0.18 |  | | 1.07 ± 0.11 | | 2.06 ± 0.19 |  | | 4.62 ± 0.28 | | 6.68 ± 0.31 |
|  |  | |  | |  |  | |  | |  |  | |  | |  |
|  | df | | F | | P |  | | F | | P |  | | F | | P |
| AMF status | 1 | | 39.053 | | **0.0002 ***** |  | | 32.272 | | **0.0005 ***** |  | | 25.948 | | **0.0009 ***** |
| RP | 1 | | 0.883 | | 0.375 |  | | 2.204 | | 0.176 |  | | 0.443 | | 0.525 |
| AMF * RP | 1 | | 0.348 | | 0.572 |  | | 0.795 | | 0.399 |  | | 4.400 | | **0.069·** |

Data are presented as means ± standard errors (n=9). The significance of treatments and interactions was determined by two-way ANOVA. ns: no significant difference

**·** P < 0.1, *P < 0.05, **P < 0.01, ***P < 0.001

Table S2: P concentration and content in the shoot and chlorophyll concentration of *Allium porrum* inoculated with or without *R. irregularis* and supplied or not with RP in the hyphosphere compartment.

|  |  | Shoot P concentration (µg/g) | |  | | Shoot P content (µg) | |  | Chlorophyll concentration (µg/cm2) | |
| --- | --- | --- | --- | --- | --- | --- | --- | --- | --- | --- |
|  |  | No AMF | with AMF |  | No AMF | | with AMF |  | No AMF | with AMF |
| P0 |  | 284.29 ± 18.26 | 401.21 ± 34.37 |  | 239.55 ± 39.32 | | 771.43 ± 84.47 |  | 31.49 ± 2.75 | 41.36 ± 2.84 |
| P1 |  | 363.63 ± 69.68 | 469.15 ± 39.36 |  | 370.24 ± 87.74 | | 917.23 ± 109.73 |  | 34.04 ± 2.41 | 50.22 ± 1.74 |
|  |  |  |  |  |  | |  |  |  |  |
|  | df | F | P |  | F | | P |  | F | P |
| AMF status | 1 | 9.923 | **0.0136 *** |  | 62.718 | | **0.0025 **** |  | 26.223 | **0.0009 ***** |
| RP | 1 | 4.291 | **0.0721·** |  | 2.661 | | 0.141 |  | 9.031 | **0.0169 *** |
| AMF * RP | 1 | 0.016 | 0.903 |  | 0.0073 | | 0.934 |  | 1.42 | 0.268 |

Data are presented as means ± standard errors (n=9). The significance of treatments and interactions was determined by two-way ANOVA. ns: no significant difference

**·** P < 0.1, *P < 0.05, **P < 0.01, ***P < 0.001

Table S3: Indicator species analysis of bacterial ASVs associated with mycelia and enriched in hyphosphere and bulk soils under RP application treatment; RP application (P1), no RP application (P0).

| **Sample type** | **RP treatment** | **BASV_ID** | **stat** | **p.value** | **Phylum** | **Classe** | **Order** | **Family** | **Genus** |
| --- | --- | --- | --- | --- | --- | --- | --- | --- | --- |
| Bulk soil | P0 | BASV1784 | 0,552 | 0.025* | p__Actinobacteria | c__Thermoleophilia | o__Gaiellales | f__Gaiellaceae | g__Unkown |
| BASV2355 | 0,502 | 0.049* | p__Chloroflexi | c__S085 | o__Unkown | f__Unkown | g__Unkown |
| BASV444 | 0,5 | 0.016* | p__Acidobacteria | c__Solibacteres | o__Solibacterales | f__Solibacteraceae | g__*Candidatus Solibacter* |
| BASV301 | 0,465 | 0.049* | p__Firmicutes | c__Bacilli | o__Bacillales | f__Bacillaceae | g__*Bacillus* |
| BASV254 | 0,452 | 0.036* | p__Planctomycetes | c__Phycisphaerae | o__WD2101 | f__Unkown | g__Unkown |
| P1 | BASV1768 | 0,733 | 0.003** | p__OD1 | c__Unkown | o__Unkown | f__Unkown | g__Unkown |
| BASV1571 | 0,616 | 0.011* | p__Planctomycetes | c__Planctomycetia | o__Pirellulales | f__Pirellulaceae | g__Unkown |
| BASV1779 | 0,538 | 0.035* | p__Planctomycetes | c__Planctomycetia | o__Pirellulales | f__Pirellulaceae | g__Unkown |
| BASV3523 | 0,526 | 0.031* | p__Planctomycetes | c__Phycisphaerae | o__WD2101 | f__Unkown | g__Unkown |
| BASV3592 | 0,497 | 0.021* | p__Planctomycetes | c__Planctomycetia | o__Planctomycetales | f__Planctomycetaceae | g__*Planctomyces* |
| BASV1001 | 0,459 | 0.049* | p__Planctomycetes | c__Planctomycetia | o__Pirellulales | f__Pirellulaceae | g__Unkown |
| BASV503 | 0,438 | 0.049* | p__Planctomycetes | c__Planctomycetia | o__Planctomycetales | f__Planctomycetaceae | g__*Planctomyces* |
| Mycelia | P0 | BASV622 | 0,61 | 0.01** | p__Planctomycetes | c__Planctomycetia | o__Pirellulales | f__Pirellulaceae | g__Unkown |
| BASV240 | 0,578 | 0.016* | p__Planctomycetes | c__Planctomycetia | o__Pirellulales | f__Pirellulaceae | g__Unkown |
| BASV1492 | 0,574 | 0.034* | p__Planctomycetes | c__Planctomycetia | o__Pirellulales | f__Pirellulaceae | g__Unkown |
| BASV524 | 0,552 | 0.002** | p__Planctomycetes | c__Phycisphaerae | o__Phycisphaerales | f__Unkown | g__Unkown |
| BASV1430 | 0,548 | 0.04* | p__Planctomycetes | c__Planctomycetia | o__Pirellulales | f__Pirellulaceae | g__Unkown |
| BASV640 | 0,545 | 0.04* | p__Planctomycetes | c__Planctomycetia | o__Gemmatales | f__Gemmataceae | g__*Gemmata* |
| BASV2857 | 0,535 | 0.027* | p__Firmicutes | c__Bacilli | o__Turicibacterales | f__Turicibacteraceae | g__*Turicibacter* |
| BASV281 | 0,519 | 0.017* | p__OD1 | c__ZB2 | o__Unkown | f__Unkown | g__Unkown |
| BASV469 | 0,513 | 0.034* | p__Planctomycetes | c__Planctomycetia | o__Planctomycetales | f__Planctomycetaceae | g__*Planctomyces* |
| BASV432 | 0,511 | 0.034* | p__Planctomycetes | c__Planctomycetia | o__Pirellulales | f__Pirellulaceae | g__Unkown |
| BASV334 | 0,508 | 0.033* | p__Planctomycetes | c__Planctomycetia | o__Pirellulales | f__Pirellulaceae | g__Unkown |
| BASV915 | 0,5 | 0.04* | p__Planctomycetes | c__Planctomycetia | o__Pirellulales | f__Pirellulaceae | g__Unkown |
| BASV21 | 0,499 | 0.031* | p__Planctomycetes | c__Planctomycetia | o__Planctomycetales | f__Planctomycetaceae | g__*Planctomyces* |
| BASV1698 | 0,495 | 0.028* | p__OD1 | c__ZB2 | o__Unkown | f__Unkown | g__Unkown |
| BASV395 | 0,48 | 0.041* | p__Planctomycetes | c__Planctomycetia | o__Gemmatales | f__Gemmataceae | g__Unkown |
| BASV101 | 0,47 | 0.035* | p__Planctomycetes | c__Planctomycetia | o__Pirellulales | f__Pirellulaceae | g__Unkown |
| BASV229 | 0,439 | 0.04* | p__OD1 | c__ZB2 | o__Unkown | f__Unkown | g__Unkown |
| BASV2733 | 0,418 | 0.037* | p__Planctomycetes | c__Planctomycetia | o__Gemmatales | f__Gemmataceae | g__*Gemmata* |
| BASV1812 | 0,411 | 0.03* | p__Planctomycetes | c__Planctomycetia | o__Planctomycetales | f__Planctomycetaceae | g__*Planctomyces* |
| BASV460 | 0,319 | 0.045* | p__Planctomycetes | c__Planctomycetia | o__Gemmatales | f__Gemmataceae | g__*Gemmata* |
| P1 | BASV170 | 0,542 | 0.021* | p__Planctomycetes | c__Planctomycetia | o__Gemmatales | f__Gemmataceae | g__*Gemmata* |
| Hyphosphere soil | P0 | BASV779 | 0,436 | 0.005** | p__Verrucomicrobia | c__Pedosphaerae | o__Pedosphaerales | f__Unkown | g__Unkown |
| P1 | BASV226 | 0,532 | 0.043* | p__OP3 | c__PBS-25 | o__Unkown | f__Unkown | g__Unkown |

Table S4: Core bacteriome of bacterial ASVs associated with AMF mycelia and in hyphosphere and bulk soils.

| **Sample type** | **BASV_ID** | **Phylum** | **Classe** | **Order** | **Family** | **Genera** |
| --- | --- | --- | --- | --- | --- | --- |
| Bulk | BASV4 | p__Chloroflexota | c__Chloroflexi | o__AKIW781 | f__Unkown | *g__Unkown* |
| BASV6 | p__Bacillota | c__Bacilli | o__Bacillales | f__Bacillaceae | *g__Bacillus* |
| BASV2 | p__Planctomycetota | c__Planctomycetia | o__Planctomycetales | f__Planctomycetaceae | *g__Planctomyces* |
| BASV22 | p__Planctomycetota | c__Planctomycetia | o__Pirellulales | f__Pirellulaceae | *g__Pirellula* |
| BASV93 | p__Planctomycetota | c__Planctomycetia | o__Gemmatales | f__Gemmataceae | *g__Gemmata* |
| Mycelia | BASV2 | p__Planctomycetota | c__Planctomycetia | o__Planctomycetales | f__Planctomycetaceae | *g__Planctomyces* |
| BASV3 | p__Planctomycetota | c__Planctomycetia | o__Pirellulales | f__Pirellulaceae | *g__Unkown* |
| BASV42 | p__Planctomycetota | c__Planctomycetia | o__Pirellulales | f__Pirellulaceae | *g__A17* |
| BASV22 | p__Planctomycetota | c__Planctomycetia | o__Pirellulales | f__Pirellulaceae | *g__Pirellula* |
| BASV24 | p__Bacillota | c__Bacilli | o__Bacillales | f__Bacillaceae | *g__Bacillus* |
| BASV430 | p__Planctomycetota | c__Planctomycetia | o__Gemmatales | f__Gemmataceae | *g__Unkown* |
| Hyphosphere soil | BASV6 | p__Bacillota | c__Bacilli | o__Bacillales | f__Bacillaceae | *g__Bacillus* |
| BASV4 | p__Chloroflexota | c__Chloroflexi | o__AKIW781 | f__Unkown | *g__Unkown* |
| BASV14 | p__Planctomycetota | c__Planctomycetia | o__Planctomycetales | f__Planctomycetaceae | *g__Planctomyces* |
| BASV16 | p__Planctomycetota | c__Planctomycetia | o__Pirellulales | f__Pirellulaceae | *g__A17* |
| BASV40 | p__Planctomycetota | c__Planctomycetia | o__Pirellulales | f__Pirellulaceae | *g__Pirellula* |
| BASV93 | p__Planctomycetota | c__Planctomycetia | o__Gemmatales | f__Gemmataceae | *g__Gemmata* |


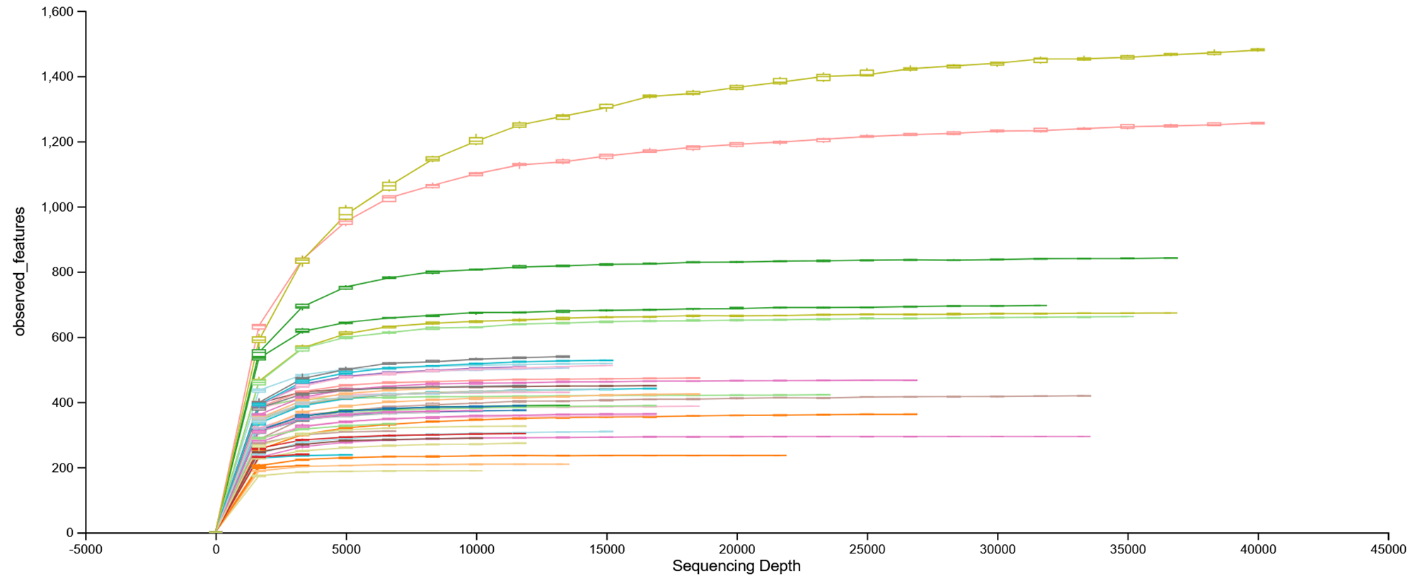


Fig. S1: Rarefaction curves showing that all samples reached saturation.
